# Supplementary material for: How satisfied are cervical dystonia patients after 3 years of botulinum toxin type A treatment? Results from a prospective, long-term observational study
Source: PubMed Central journal article supplement (PMC6851034; doi:10.1007/s00415-019-09527-2), 2019-09-09
Supplement: 415_2019_9527_MOESM1_ESM.pdf [file 415_2019_9527_MOESM1_ESM.pdf]

Supplementary File

Table e1. Step 1: Factors potentially associated with 'Today' and 'Highest' Satisfaction

| Factor                                                            | Effect           | Today Satisfaction     |         | Highest Satisfaction   |         |
|-------------------------------------------------------------------|------------------|------------------------|---------|------------------------|---------|
|                                                                   |                  | Odds Ratio<br>(95% CI) | p-value | Odds Ratio<br>(95% CI) | p-value |
| BMI Category (kg/m <sup>2</sup> )                                 | 25.0-29.9        | 0.905 (0.681, 1.204)   | 0.8621  | 1.342 (0.848, 2.163)   | 0.0658  |
|                                                                   | <18.5            | 0.804 (0.406, 1.592)   |         | 0.415 (0.192, 0.975)   |         |
|                                                                   | >=30.0           | 0.965 (0.655, 1.424)   |         | 0.876 (0.505, 1.585)   |         |
| Age Category                                                      | 18-30            | 1.046 (0.530, 2.097)   | 0.4998  | 0.796 (0.322, 2.266)   | 0.9921  |
|                                                                   | 31-40            | 1.107 (0.692, 1.779)   |         | 1.113 (0.548, 2.377)   |         |
|                                                                   | 51-60            | 0.802 (0.559, 1.148)   |         | 1.039 (0.596, 1.794)   |         |
|                                                                   | 61-70            | 0.883 (0.608, 1.279)   |         | 1.074 (0.606, 1.899)   |         |
|                                                                   | >70              | 1.168 (0.740, 1.852)   |         | 0.965 (0.495, 1.943)   |         |
| Sex                                                               | Female           | 0.972 (0.743, 1.271)   | 0.8377  | 0.901 (0.589, 1.355)   | 0.6218  |
| First injection of BoNT for CD at baseline                        | Yes              | 0.755 (0.508, 1.121)   | 0.1630  | 0.944 (0.536, 1.781)   | 0.8505  |
| Mean Injection Interval (weeks) prior to Satisfaction measurement | Continuous weeks | 1.034 (1.003, 1.070)   | 0.0291  | 1.073 (1.010, 1.150)   | 0.0198  |

| Factor                                                                   | Effect                 | Today Satisfaction     |         | Highest Satisfaction   |         |
|--------------------------------------------------------------------------|------------------------|------------------------|---------|------------------------|---------|
|                                                                          |                        | Odds Ratio<br>(95% CI) | p-value | Odds Ratio<br>(95% CI) | p-value |
| Number of injection intervals prior to Satisfaction measurement          | Continuous count       | 0.983 (0.945, 1.021)   | 0.3706  | 1.083 (1.025, 1.143)   | 0.0051  |
| Other head/neck component at baseline                                    | Complex deviation type | 0.786 (0.582, 1.057)   | 0.1115  | 1.269 (0.815, 1.935)   | 0.2852  |
| TWSTRS Total Score at baseline                                           | Continuous 0-85        | 0.978 (0.968, 0.988)   | <.0001  | 0.985 (0.971, 1.000)   | 0.0428  |
| TWSTRS Pain Score at baseline                                            | Continuous 0-20        | 0.971 (0.946, 0.996)   | 0.0256  | 0.937 (0.901, 0.974)   | 0.0010  |
| Tremor at baseline                                                       | Yes                    | 0.964 (0.751, 1.238)   | 0.7743  | 1.152 (0.786, 1.694)   | 0.4671  |
| Jerk at baseline                                                         | Yes                    | 0.952 (0.623, 1.460)   | 0.8210  | 1.810 (0.875, 4.391)   | 0.1154  |
| Shoulder elevation at baseline                                           | Yes                    | 0.777 (0.605, 0.998)   | 0.0485  | 1.144 (0.781, 1.679)   | 0.4901  |
| History of CD                                                            | Familial               | 0.962 (0.577, 1.613)   | 0.8814  | 1.324 (0.603, 3.496)   | 0.5101  |
| Duration of CD (years)                                                   | <1                     | 0.695 (0.418, 1.156)   | 0.1275  | 0.671 (0.335, 1.443)   | 0.5241  |
|                                                                          | >5                     | 0.779 (0.596, 1.017)   |         | 0.851 (0.557, 1.284)   |         |
| Use of any injection guidance technique prior to satisfaction assessment | Yes                    | 0.955 (0.742, 1.229)   | 0.7221  | 0.997 (0.679, 1.470)   | 0.9861  |
| Focal cervical dystonia at baseline                                      | Yes                    | 1.272 (0.854, 1.896)   | 0.2368  | 1.084 (0.575, 1.911)   | 0.7917  |
| Segmental dystonia at baseline                                           | Yes                    | 0.858 (0.534, 1.382)   | 0.5274  | 1.601 (0.735, 4.207)   | 0.2540  |

| Factor                                                                                    | Effect | Today Satisfaction     |         | Highest Satisfaction   |         |
|-------------------------------------------------------------------------------------------|--------|------------------------|---------|------------------------|---------|
|                                                                                           |        | Odds Ratio<br>(95% CI) | p-value | Odds Ratio<br>(95% CI) | p-value |
| Hemi dystonia at baseline                                                                 | Yes    | >999.999 (0.141, .)    | 0.2731  | >999.999 (0.023, .)    | 0.6121  |
| Multifocal dystonia at baseline                                                           | Yes    | 0.819 (0.299, 2.245)   | 0.6935  | 0.588 (0.186, 2.592)   | 0.4380  |
| Generalised dystonia at baseline                                                          | Yes    | 0.517 (0.189, 1.324)   | 0.1698  | 0.347 (0.128, 1.097)   | 0.0692  |
| BoNT injection for other indication within 12 months from baseline?                       | Yes    | 0.626 (0.265, 1.436)   | 0.2679  | 1.449 (0.418, 9.140)   | 0.6004  |
| Tsui score at baseline                                                                    | 1      | 1.013 (0.750, 1.370)   | 0.9868  | 1.076 (0.687, 1.703)   | 0.7914  |
|                                                                                           | 2      | 1.046 (0.731, 1.501)   |         | 1.276 (0.737, 2.305)   |         |
|                                                                                           | 4      | 1.070 (0.713, 1.610)   |         | 1.270 (0.687, 2.511)   |         |
| Total BoNT-A injection dose category based on last dose prior to satisfaction measurement | <Q1    | 0.957 (0.690, 1.331)   | 0.0564  | 0.746 (0.454, 1.257)   | 0.1193  |
|                                                                                           | >Q3    | 0.686 (0.501, 0.938)   |         | 0.617 (0.389, 0.992)   |         |
| Surgical history for CD                                                                   | Yes    | 0.521 (0.215, 1.199)   | 0.1255  | 0.483 (0.189, 1.485)   | 0.1868  |

*p* values are for the likelihood Chi-Square. Grey rows indicate entry into Step 2.

BMI: body mass index; BoNT: botulinum neurotoxin; BoNT-A: botulinum neurotoxin type A; CD: cervical dystonia; CI: confidence interval; Kg: kilogram; m<sup>2</sup>: meter square; Q: quartile; TWSTRS: Toronto Western Spasmodic Torticollis Rating Scale

**Table e2. Step 2: Test of independence for factors identified in Step 1**

| Interaction                                                  | Test of independence <sup>1</sup> | p-value | Decision                               |
|--------------------------------------------------------------|-----------------------------------|---------|----------------------------------------|
| <b>Today satisfaction</b>                                    |                                   |         |                                        |
| Interaction                                                  | Test of independence <sup>1</sup> | p-value | Decision                               |
| <b>Today satisfaction</b>                                    |                                   |         |                                        |
| Baseline TWSTRS pain * Baseline TWSTRS total                 | Pearson correlation               | <.0001  | baseline TWSTRS pain dropped           |
| Baseline TWSTRS pain * Mean Injection Interval               | Pearson correlation               | 0.8703  |                                        |
| Baseline TWSTRS * mean Injection Interval                    | Pearson correlation               | 0.8205  |                                        |
| Baseline TWSTRS pain * BoNT-A injection dose category        | Spearman correlation              | 0.0029  |                                        |
| Baseline TWSTRS pain * Duration of CD                        | Spearman correlation              | 0.2570  |                                        |
| Baseline TWSTRS total * BoNT-A injection dose category       | Spearman correlation              | <.0001  | BoNT-A injection dose category dropped |
| Baseline TWSTRS total * Duration of CD                       | Spearman correlation              | 0.2430  |                                        |
| mean Injection Interval * BoNT-A injection dose category     | Spearman correlation              | 0.0442  |                                        |
| mean Injection Interval * Duration of CD                     | Spearman correlation              | 0.0262  |                                        |
| Baseline shoulder elevation * Baseline generalised CD        | Chi-Square                        | 0.0623  |                                        |
| Baseline shoulder elevation * BoNT-A injection dose category | Chi-Square                        | 0.0105  |                                        |
| Baseline shoulder elevation * Surgical history               | Chi-Square                        | 0.0029  |                                        |
| Baseline shoulder elevation * Duration of CD                 | Chi-Square                        | 0.7401  |                                        |
| Baseline generalised CD * BoNT-A injection dose category     | Chi-Square                        | 0.2313  |                                        |

|                                                               |               |        |                                        |
|---------------------------------------------------------------|---------------|--------|----------------------------------------|
| Baseline generalised CD * Surgical history                    | Chi-Square    | 0.3553 |                                        |
| Baseline head/neck component * Baseline shoulder elevation    | Chi-Square    | <.0001 | Baseline head/neck component dropped   |
| Baseline head/neck component * Baseline generalised CD        | Chi-Square    | 0.0175 |                                        |
| Baseline head/neck component * BoNT-A injection dose category | Chi-Square    | 0.0619 |                                        |
| Baseline head/neck component * Surgical history               | Chi-Square    | 0.2674 |                                        |
| Baseline head/neck component * Duration of CD                 | Chi-Square    | 0.8779 |                                        |
| BoNT-A injection dose category * Surgical history             | Chi-Square    | 0.7309 |                                        |
| NAIVE * Baseline shoulder elevation                           | Chi-Square    | 0.1072 |                                        |
| NAIVE * Baseline generalised CD                               | Chi-Square    | 0.9952 |                                        |
| NAIVE * Baseline head/neck component                          | Chi-Square    | 0.4545 |                                        |
| NAIVE * BoNT-A injection dose category                        | Chi-Square    | 0.0063 |                                        |
| NAIVE * Surgical history                                      | Chi-Square    | 0.2940 |                                        |
| NAIVE * Duration of CD                                        | Chi-Square    | <.0001 | NAIVE dropped                          |
| Duration of CD * Baseline generalised CD                      | Chi-Square    | 0.0604 |                                        |
| Duration of CD * BoNT-A injection dose category               | Chi-Square    | 0.0008 | BoNT-A injection dose category dropped |
| Duration of CD * Surgical history                             | Chi-Square    | 0.0799 |                                        |
| Baseline TWSTRS pain * Baseline shoulder elevation            | Pooled t-test | <.0001 | Baseline shoulder elevation dropped    |
| Baseline TWSTRS pain * Baseline generalised CD                | Pooled t-test | 0.2446 |                                        |
| Baseline TWSTRS pain * Baseline head/neck component           | Pooled t-test | 0.0065 |                                        |
| Baseline TWSTRS pain * NAIVE                                  | Pooled t-test | 0.0365 |                                        |

|                                                         |                                         |                |                                       |
|---------------------------------------------------------|-----------------------------------------|----------------|---------------------------------------|
| Baseline TWSTRS pain * surgical history                 | Pooled t-test                           | 0.0200         |                                       |
| Baseline TWSTRS total * Baseline shoulder elevation     | Pooled t-test                           | <.0001         | Baseline shoulder elevation dropped   |
| Baseline TWSTRS total * Baseline generalised CD         | Pooled t-test                           | 0.0036         |                                       |
| Baseline TWSTRS total * Baseline head/neck component    | Pooled t-test                           | <.0001         | Baseline head/neck component dropped  |
| Baseline TWSTRS total * NAIVE                           | Pooled t-test                           | 0.0573         |                                       |
| Baseline TWSTRS total * Surgical history                | Pooled t-test                           | 0.0167         |                                       |
| mean Injection Interval * Baseline shoulder elevation   | Pooled t-test                           | 0.5303         |                                       |
| mean Injection Interval * Baseline generalised CD       | Pooled t-test                           | 0.0391         |                                       |
| Mean Injection Interval * Baseline head/neck component  | Pooled t-test                           | 0.8410         |                                       |
| <b>Highest satisfaction</b>                             |                                         |                |                                       |
| <b>Interaction</b>                                      | <b>Test of independence<sup>1</sup></b> | <b>p-value</b> | <b>Decision</b>                       |
| Baseline TWSTRS pain * Baseline TWSTRS total            | Pearson correlation                     | <.0001         | Baseline TWSTRS pain dropped          |
| Baseline TWSTRS pain * Mean injection interval          | Pearson correlation                     | 0.8703         |                                       |
| Baseline TWSTRS pain * Number of injection intervals    | Pearson correlation                     | 0.1748         |                                       |
| Baseline TWSTRS total * Mean injection interval         | Pearson correlation                     | 0.8205         |                                       |
| Baseline TWSTRS total * Number of injection intervals   | Pearson correlation                     | 0.9860         |                                       |
| Number of injection intervals * Mean injection interval | Pearson correlation                     | <.0001         | Number of injection intervals dropped |

|                                                               |                      |         |                      |
|---------------------------------------------------------------|----------------------|---------|----------------------|
| Baseline TWSTRS Pain * BMI category                           | Spearman correlation | 0.0100  |                      |
| Baseline TWSTRS Pain * BoNT-A injection dose category         | Spearman correlation | 0.0029  |                      |
| Baseline TWSTRS * BMI category                                | Spearman correlation | 0.1144  |                      |
| Baseline TWSTRS * BoNT-A injection dose category              | Spearman correlation | <0.0001 |                      |
| Mean injection intervals*BMI category                         | Spearman correlation | 0.8142  |                      |
| Mean injection intervals* BoNT-A injection dose category      | Spearman correlation | 0.0442  |                      |
| Number of injection intervals*BMI category                    | Spearman correlation | 0.8555  |                      |
| Number of injection intervals* BoNT-A injection dose category | Spearman correlation | 0.2047  |                      |
| Baseline generalised CD* BoNT-A injection dose category       | Chi-Square           | 0.2313  |                      |
| Baseline generalised CD*Surgical history                      | Chi-Square           | 0.3553  |                      |
| Jerk at baseline * Baseline generalised CD                    | Chi-Square           | 0.8222  |                      |
| Jerk at baseline* BoNT-A injection dose category              | Chi-Square           | 0.1497  |                      |
| Jerk at baseline* Surgical history                            | Chi-Square           | 0.4181  |                      |
| BMI category*Baseline generalized CD                          | Chi-Square           | 0.0006  | BMI category dropped |
| BMI category*Jerk at baseline                                 | Chi-Square           | 0.1648  |                      |
| BMI category* BoNT-A injection dose category                  | Chi-Square           | <0.0001 | BMI category dropped |
| BMI category*Surgical history                                 | Chi-Square           | 0.7384  |                      |
| BoNT-A injection dose category*Surgical history               | Chi-Square           | 0.7309  |                      |
| Baseline TWSTRS Pain * Baseline generalized CD                | Pooled t-test        | 0.2446  |                      |

|                                                       |               |         |                             |
|-------------------------------------------------------|---------------|---------|-----------------------------|
| Baseline TWSTRS Pain * Jerk at baseline               | Pooled t-test | <0.0001 | Jerk at baseline<br>dropped |
| Baseline TWSTRS Pain * Surgical History               | Pooled t-test | 0.0200  |                             |
| Baseline TWSTRS * Baseline generalized CD             | Pooled t-test | 0.0036  |                             |
| Baseline TWSTRS * Jerk at baseline                    | Pooled t-test | <0.0001 | Jerk at baseline<br>dropped |
| Baseline TWSTRS * Surgical History                    | Pooled t-test | 0.0167  |                             |
| Mean Injection intervals * Baseline<br>generalized CD | Pooled t-test | 0.0391  |                             |
| Mean Injection intervals * Jerk at baseline           | Pooled t-test | 0.8519  |                             |
| Mean Injection intervals * Surgical History           | Pooled t-test | 0.6602  |                             |
